# Behaviour of nucleolar proteins in nuclei lacking ribosomal genes

## A study by confocal laser scanning microscopy

D. HERNANDEZ-VERDUN<sup>1,\*</sup>, M. ROBERT-NICOUD<sup>2</sup>, G. GERAUD<sup>1</sup> and C. MASSON<sup>1</sup>

<sup>1</sup>*Institut Jacques Monod, 2 place Jussieu, 75251 Paris Cedex 05, France*

<sup>2</sup>*Max-Planck-Institut für Biophysikalische Chemie, Postfach 2841, D-3400 Göttingen, RFA*

\* Author for correspondence

### Summary

The behaviour of nucleolar proteins in cycling PtK<sub>1</sub> cells and in micronuclei with or without NORs was investigated by immunofluorescence using antibodies from autoimmune sera and confocal laser scanning microscopy. These antibodies were shown by electron microscopy to recognize antigens confined to only one of the three basic nucleolar components: fibrillar centres (FC), dense fibrillar component (DFC) and granular component (GC). Serial optical sections allowed us to determine the three-dimensional organization of these components in the nucleolus of cycling cells. Furthermore, clear differences were found in the distribution of the various antigens in micronucleated cells. Three

patterns could be observed: (1) the FC antigens were found mainly in the nucleoli, but also in varying amounts in the dots; (2) surprisingly, the DFC antigens were found to accumulate preferentially in the dots; (3) the GC-specific marker stained intensively the nucleoli as well the dots. The results are interpreted with regard to possible mechanisms for targeting nucleolar proteins to the site of nucleolar formation.

Key words: nucleolar proteins, three-dimensional organization, micronuclei, confocal microscopy.

### Introduction

The translocation of proteins from the cytoplasm into the nucleus is likely to occur in at least two steps: (1) the transport to the nucleus; and (2) the targeting to their specific sites. These two steps may be under the control of two different mechanisms. In the first step, the role of signal sequences, chaperone molecules and specific receptors in the pore complexes has been demonstrated for some proteins (Dingwall *et al.* 1988; Newmeyer and Forbes, 1988; Akey and Goldfarb, 1989; Hunt, 1989; Yamasaki *et al.* 1989). The second step is poorly understood (Roth and Gall, 1989). Proteins could reach their final position in the nuclei either directly or after forming preassembled complexes.

To gain insight into this latter mechanism, we chose to study the behaviour of nucleolar proteins in nuclei with and without nucleolar organizer regions (NORs). Our choice was dictated by the following considerations: (1) these proteins are assigned to a specific nuclear domain, the nucleolus, which is easy to identify by light microscopy; (2) the formation of nuclei lacking ribosomal genes can be experimentally induced by micronucleation (Ringertz and Savage, 1976); (3) antibodies specific for proteins confined to one subnucleolar component that have been obtained from human autoantibody banks can be used as specific markers (Hernandez-Verdun *et al.* 1988; Masson *et al.* 1990).

From electron-microscopic studies it is known that the nucleoli, which provide structural support for rDNA

transcription as well as for the maturation and storage of the preribosomal subunits, are subdivided into three morphologically distinct components: the fibrillar centres (FC), which correspond to the nucleolar organizer regions (NORs); the dense fibrillar components (DFC), where transcription takes place; and the granular component (GC), the site of maturation and storage of the ribosomal subunits (Goessens, 1984; Hadjiolov, 1985; Hernandez-Verdun, 1986; Scheer and Benavente, 1990). During active rDNA transcription these three basic nucleolar components are intermingled, rendering difficult the analysis of their three-dimensional arrangement. Electron-microscopic studies have yielded much information on the single nucleolar components at the ultrastructural level but do not permit an easy determination of their spatial distribution in the relatively large nucleolar volume. To overcome these difficulties we used confocal laser scanning microscopy (CLSM) to determine the relative positions of the three basic nucleolar components. For selective labelling we used antibodies shown by electron microscopy to recognize antigens confined to only one nucleolar component.

Each of these specific antibodies was also applied to micronucleated cells in order to investigate the distribution of the respective antigens in micronuclei that possess actively transcribed ribosomal genes and in those lacking these genes. Micronucleation can be induced experimentally when cells in culture are exposed to agents interfering with the mitotic spindle (Ringertz and Savage, 1976). We have shown that colchicine can induce the

formation of micronuclei containing single chromosomes in PtK<sub>1</sub> cells (Frackowiak *et al.* 1986; Labidi *et al.* 1987a) and that these micronuclei are transcriptionally active (Labidi *et al.* 1987b). The ribosomal genes are segregated in those micronuclei containing the X-chromosome and the ribosomal RNAs could be found only in this kind of micronuclei (Labidi *et al.* 1990). However, in the micronuclei lacking ribosomal genes, the presence of nucleolar specific proteins has been demonstrated (Hernandez-Verdun *et al.* 1979; Benavente *et al.* 1988b). In the present work, we describe the behaviour of certain nucleolar proteins in these different types of micronuclei.

## Materials and methods

### Cells and immunofluorescence labelling

PtK<sub>1</sub> cells were cultured in Eagle's minimum essential medium (EMEM) with 0.85 g l<sup>-1</sup> NaHCO<sub>3</sub> supplemented with 10% fetal calf serum and 2% glutamine. Micronucleation was induced by culturing actively growing PtK<sub>1</sub> cells for 48 h in the presence of 1 µg ml<sup>-1</sup> of colchicine. For immunofluorescence the cells were grown on coverslips, rinsed in phosphate-buffered saline (PBS) and fixed with 3% formaldehyde in PBS containing 1% Triton X-100, or in cold acetone for 4 min. Cells were incubated with sera at the following dilutions: 1/50 for V11, 1/100 for G04, 1/100 to 1/500 for A10. The antibodies were revealed by FITC-conjugated goat anti-human IgG at 1/200 dilution and the DNA was visualized with DAPI. The mounting medium was the anti-fading Citifluor LTD (City University, London).

Human TG and HeLa cells were grown in EMEM with 10% heat-inactivated fetal calf serum.

### The autoimmune sera

The sera were screened from a human autoantibody bank. Out of the 356 sera containing nucleolar autoantibodies, as identified by indirect immunofluorescence, we selected those that did not contain additional autoantibodies against a variety of nuclear and cytoplasmic antigens. The presence of autoantibodies against nRNP, Sm, La/SS-B, Scl 70, Jo1, PCNA and Ro/SS-A antigens was checked as already described. Among the selected sera, we chose those exhibiting the highest selectivity for one of the nucleolar components. Finally, we worked with three different sera from patients with systemic autoimmune disease: V11, A10, G04. The antigens recognized by these sera were identified on immunoblots using the procedure already described by Masson *et al.* (1990).

### Electron microscopy

The standard procedures for electron microscopy on PtK<sub>1</sub> cells have been described previously (Géraud *et al.* 1989). For the immunolabelling, we used the two sensitive cryotechniques described for immunoelectron microscopy.

(1) Cells were washed twice in PBS and fixed for 1 h at room temperature with either phosphate-buffered 4% paraformaldehyde or 2% paraformaldehyde containing 0.1% glutaraldehyde. After fixation, free aldehyde groups were blocked by incubation in 0.5 M NH<sub>4</sub>Cl for 2 h at room temperature. Fixed cells were rapidly plunged into liquid nitrogen after cryoprotection and then cryosectioned according to the method of Tokuyasu (1973).

(2) Cell monolayers seeded on Millipore chambers (Millicell-HA) were fixed *in situ* by quick-freezing using the Reichert-Jung Cryovacuum block, according to the method of Escaig (1981). The frozen monolayers were stored in liquid nitrogen and submitted for 3 days to cryosubstitution by acetone and then a mixture of 1.5% OsO<sub>4</sub> and acetone before embedding in Epon. To permit labelling of antigenic sites on osmium-fixed samples, HeLa cell monolayer sections were pretreated with a saturated aqueous solution of sodium metaperiodate (Bendayan and Zollinger, 1983) for 20 min before incubation with antibodies.

The labelling with the different antibodies was performed by

incubations with appropriately diluted sera followed by several washes and incubation with 10 nm protein A-gold particles or 10 nm anti-human IgG-gold particles. The procedures have been described in detail previously (Hernandez-Verdun *et al.* 1988; Masson *et al.* 1990). The control assays were carried out with a pool of normal human sera.

### Confocal laser scanning microscopy

The laser scanning microscope (Carl Zeiss, Oberkochen, FRG) used in this study has been described previously (Robert-Nicoud *et al.* 1989). It is equipped with three laser excitation systems, confocal optics and a high-precision mechanical scanning stage (0.25 µm in the X/Y plane and 50 nm for the Z axis) operated by an MPC controller through an IEEE interface. The acquisition of data is through an 8-bit 512/512 frame buffer coupled by an IEEE interface to a central DEC Micro Vax II processing system. Image processing was carried out using TCL-image (Multihouse, TSI Amsterdam) an image analysis software developed at the Delft Centre for Image Processing. Confocal sections were obtained using an oil-immersion Plan-Apochromat 63/1.4 objective and zoom factors between 4 and 8. Excitation was at 488 nm; fluorescence emission was measured using a FT 510 dichroic and a longpass filter (LP515). Series of up to 15 optical sections 0.5–1 µm apart were used to generate stereoscopic reconstructions of the structures according to the method of Inoué and Inoué (1986) or Brakenhoff *et al.* (1986). Three-dimensional reconstructions were computed using Pericolor 2001 (MS21 Guyancourt France) and displayed by the back-to-front colour-range method (Géraud *et al.* 1988).

## Results

### Electron-microscopic localization of the antigens

From the sera containing antibodies with nucleolar specificity and showing no cross-reactivity with other nuclear or cytoplasmic proteins, we selected those found by immunofluorescence microscopy to label only part of the nucleoli. These sera were then applied to electron-microscopic (EM) preparations in order to determine if the antigens were confined to one of the three nucleolar components. We tested a number of electron-microscopic procedures and selected those with optimal antigen preservation for each of the different sera. Using these different procedures, we determined the nucleolar localization of seven sera. Three of these were found to detect antigens confined to only one of the basic nucleolar components and one stained two of them. The V11 serum was found to be specific for the fibrillar centres (FC); as shown in cryosections, gold particles were exclusively located on this region (Fig. 1A). The staining pattern obtained on cryosections with A10 serum clearly showed a specific labelling of the DFC at dilutions ranging from 1/10 to 1/50 (Fig. 1B). A specific labelling of the GC was observed on quick-frozen samples with the G04 serum at 1/200 dilution (Fig. 1C). The antigens recognized by the sera found by EM to label specific nucleolar components were characterized by immunoblotting (Fig. 1D). The V11 serum recognizes a 70 × 10<sup>3</sup> M<sub>r</sub> nucleolar antigen, the A10 serum a 116 × 10<sup>3</sup> M<sub>r</sub> antigen. The G04 serum shows a strong reaction with a 52 × 10<sup>3</sup> M<sub>r</sub> and a weaker reaction with a 66 × 10<sup>3</sup> M<sub>r</sub> antigen. These sera were used as probes for investigating by confocal microscopy the distribution of the corresponding antigens in cycling and in micronucleated PtK<sub>1</sub> cells.

### Ultrastructure of PtK<sub>1</sub> nucleoli and micronuclei dots

PtK<sub>1</sub> cells were chosen for this investigation for two reasons: (1) they possess a simple karyotype with only one

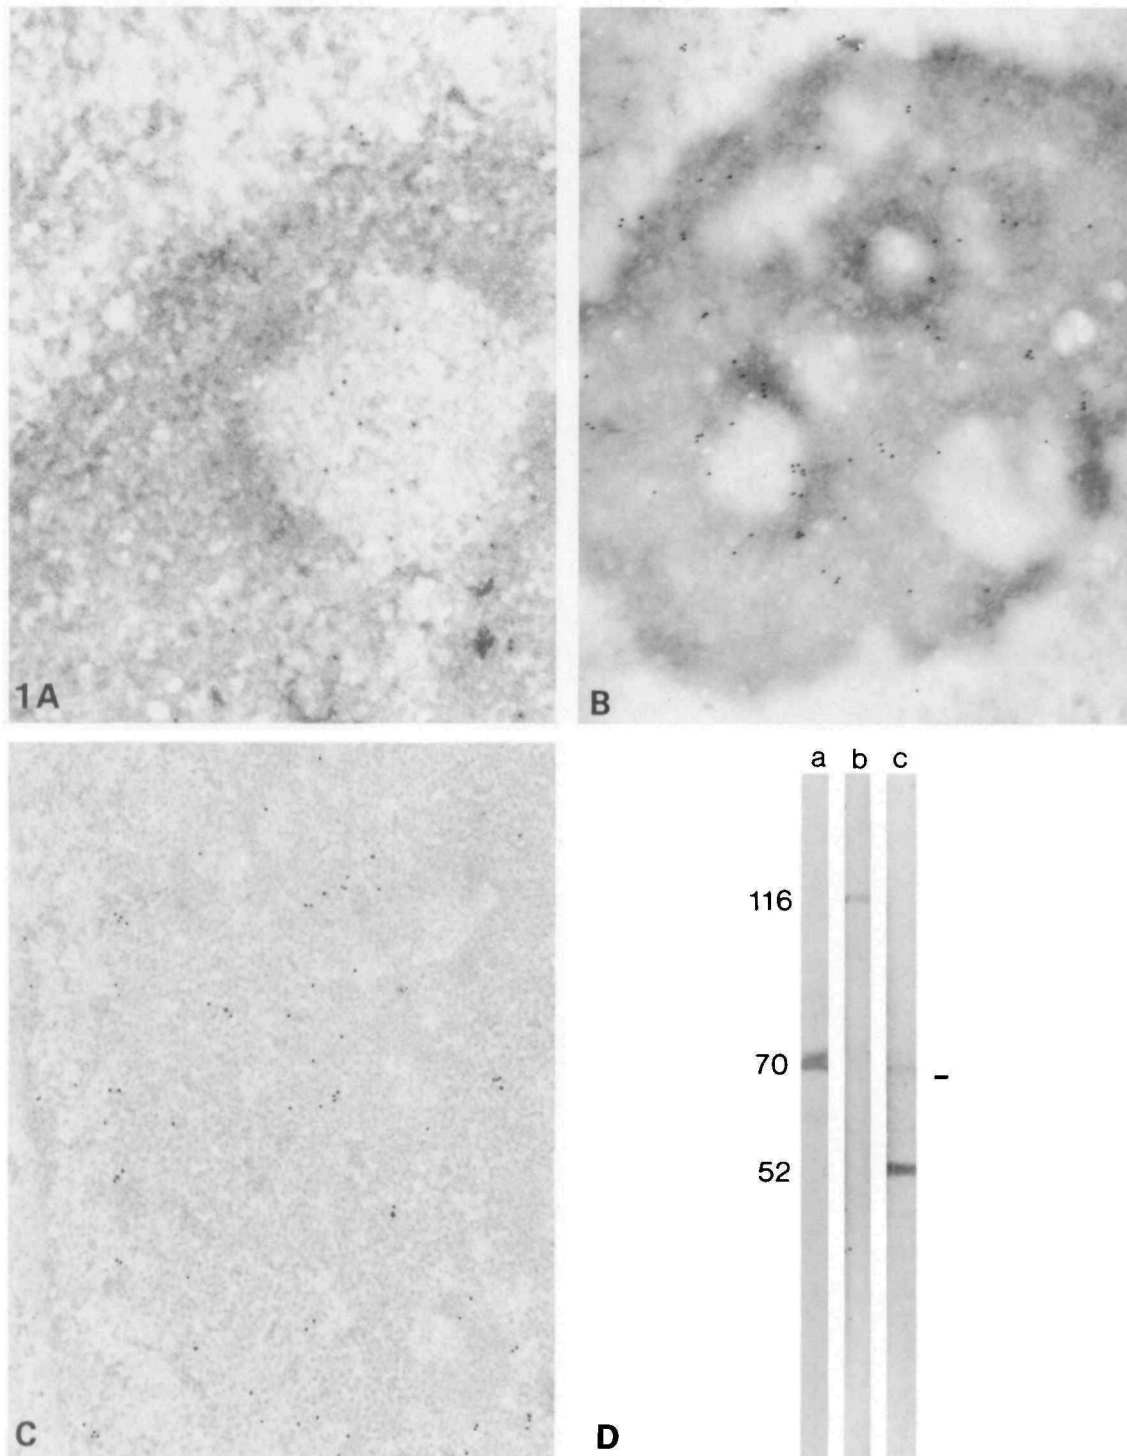

**Fig. 1.** Ultrastructural localization and characterization by immunoblotting of the antigens recognized by the three sera. (A) Immunolabelling of TG cell cryosection with V11 serum. Serum was applied at 1/10 dilution for 15 min and revealed using 10 nm protein A-gold particles. The gold particles are observed exclusively on the fibrillar centre (FC).  $\times 45\,000$ . (B) Immunolabelling of TG cell cryosection with A10 serum. Serum was applied at 1/50 dilution for 15 min followed by 10 nm protein A-gold particle labelling. The gold particles are distributed on the dense fibrillar component (DFC).  $\times 48\,000$ . (C) Immunolabelling of quick-frozen HeLa cell section with G04 serum. Serum was applied at 1/200 dilution for 2 h followed by 10 nm IgG-gold particle labelling. The gold particles are localized over the granular component (GC).  $\times 48\,000$ . (D) HeLa nuclear proteins blotted on nitrocellulose were incubated with the three sera. The specific bands were revealed by peroxidase-conjugated anti-human immunoglobulins. Lane a, V11 serum; lane b, A 10 serum; lane c, G04 serum.

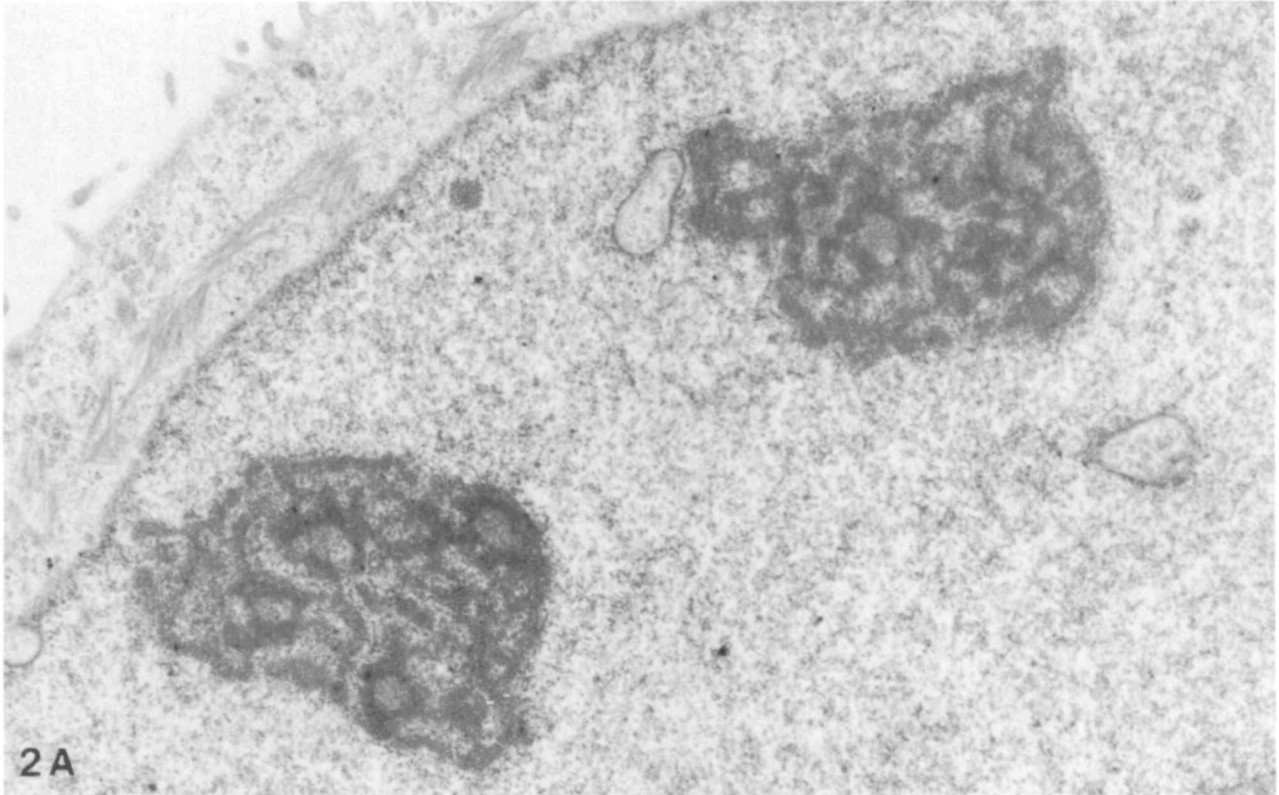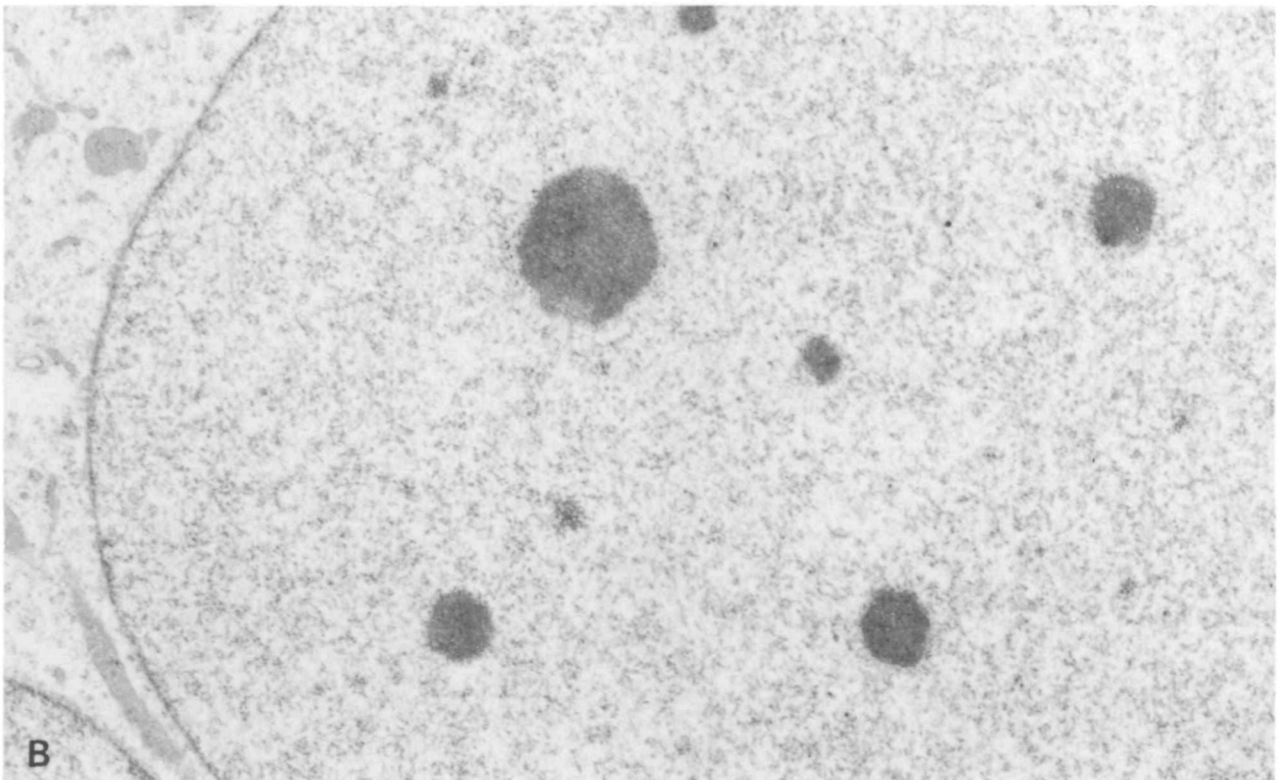

**Fig. 2.** (A) Ultrastructural morphology of nucleoli in a cycling PtK<sub>1</sub> cell. Cells were fixed by glutaraldehyde and osmic acid and embedded in Epon; the sections were then contrasted by uranyl acetate and lead citrate. The two nucleoli exhibit a reticulated organization with a few FCs included in a network of DFC.  $\times 25\,000$ . (B) Ultrastructural morphology of nucleolus-like bodies (dots) in a micronucleated PtK<sub>1</sub> cell. Preparation procedure as above. The dots show a dense homogeneous fibrillar structure.  $\times 25\,000$ .

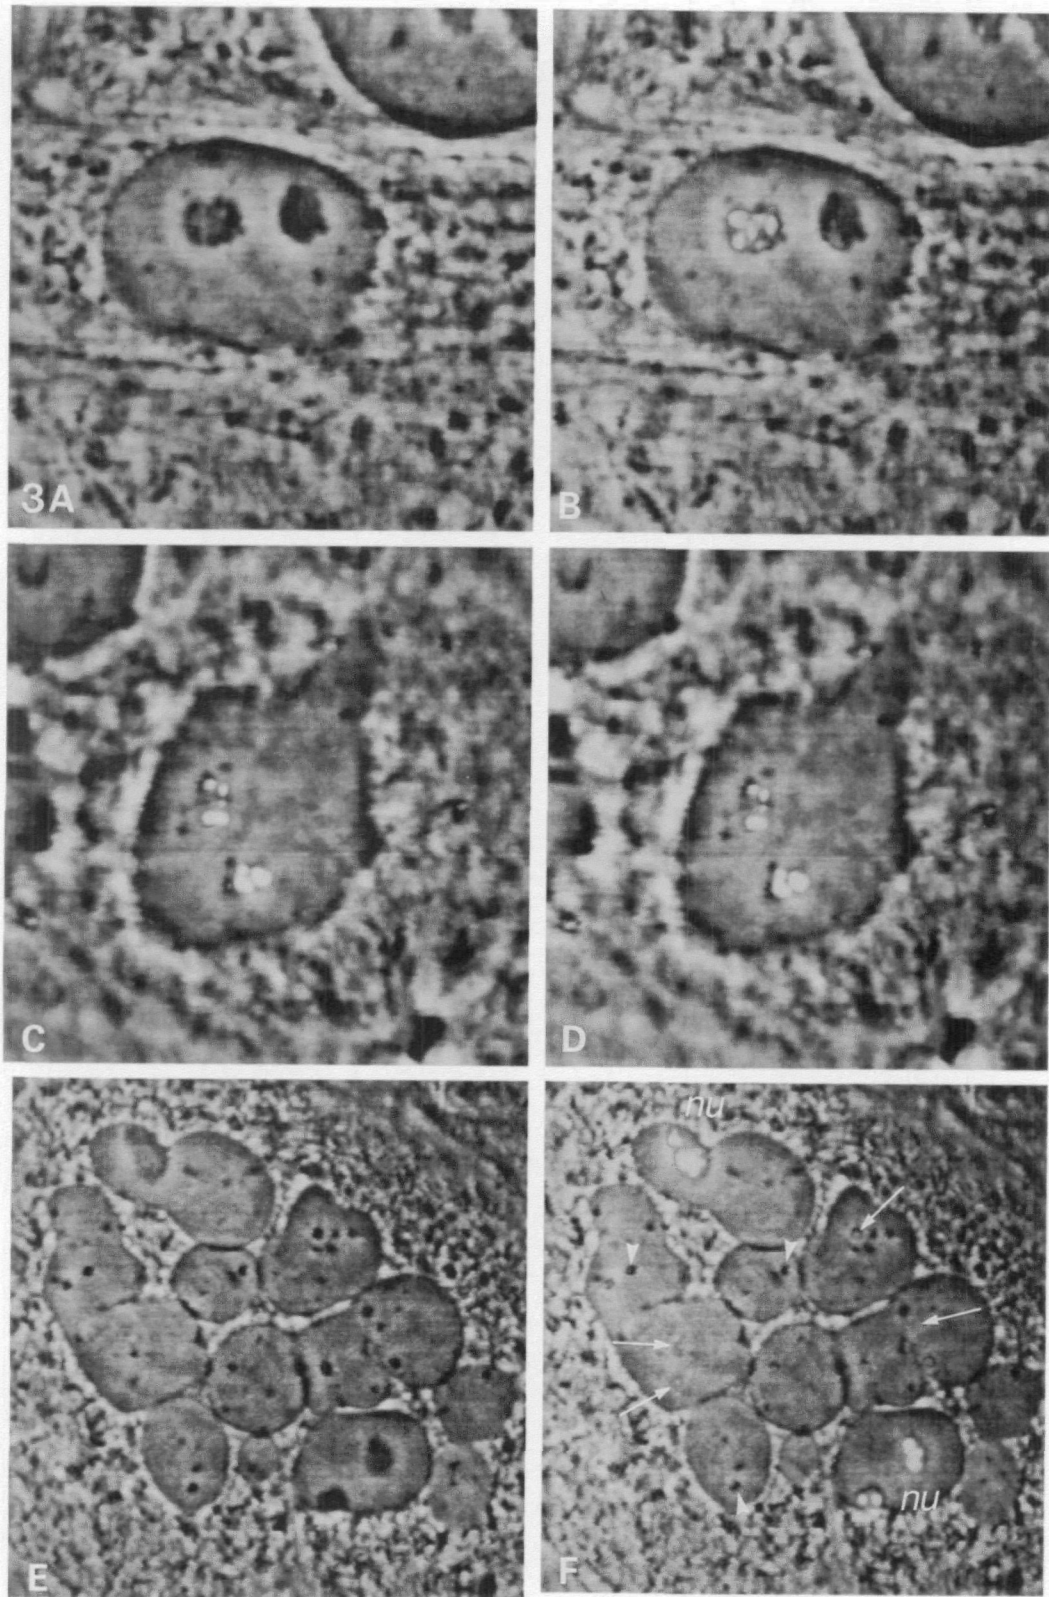

**Fig. 3.** CLSM localization of the FC-specific marker. (A–B) Interphase PtK<sub>1</sub> cell. (A) Phase-contrast. (B) Superimposition of immunofluorescence (confocal optical section) and phase-contrast images. The labelling is seen in one nucleolus in 5 beaded structures. No labelling was observed in the other nucleolus at this focal plane, but was visible at other levels.  $\times 2500$ . (C–D) Telophase PtK<sub>1</sub> cell. Stereoscopic reconstruction from 3 optical sections. Labelling is shown superimposed onto the phase-contrast image. Both newly formed nucleoli exhibit labelling in 3 or 4 regions.  $\times 2800$ . (E–F) Micronucleated PtK<sub>1</sub> cell. (E) Phase-contrast. (F) Superimposition of immunofluorescence and phase-contrast images. The labelling is highest in the nucleoli (nu) and some dots are weakly labelled (arrows); others show no labelling (arrowheads).  $\times 1800$ .

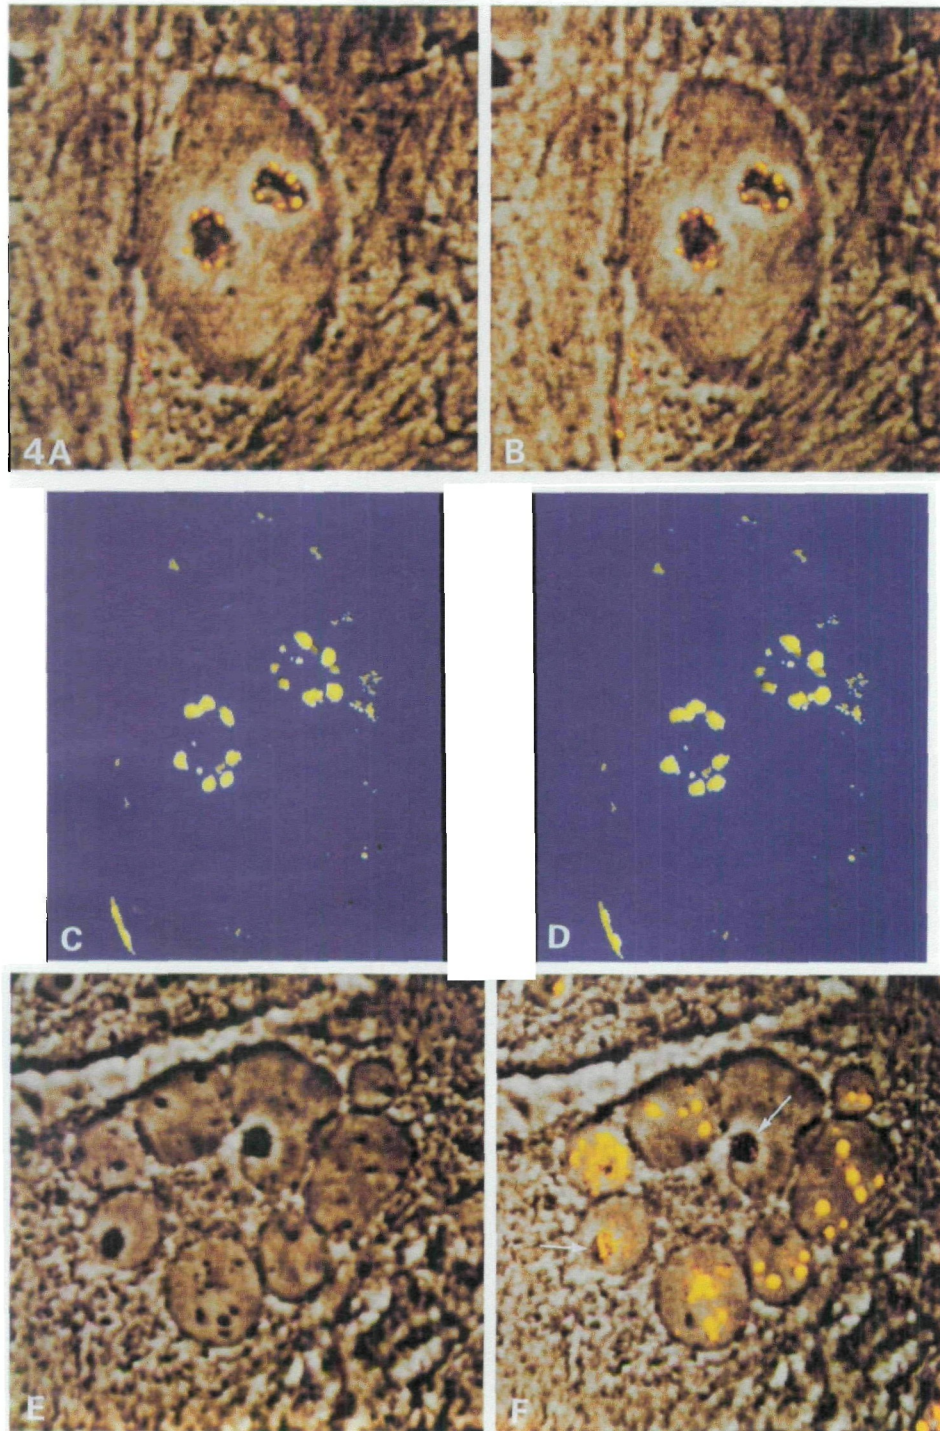

**Fig. 4.** CLSM localization of the DFC-specific marker. (A–B) Interphase PtK<sub>1</sub> cell. Stereoscopic reconstruction from 9 optical sections 0.5  $\mu$ m apart. Labelling is shown superimposed on the phase-contrast image. Both nucleoli exhibit labelling as 6–7 beaded structures localized over the region with high contrast.  $\times 3300$ . (C–D) Computer-assisted 3-D reconstruction from a series of 9 confocal immunofluorescence images showing the spatial organization of the labelled structures. Stereoviewing of these reconstructions shows a spiral distribution.  $\times 4200$ . (E–F) Micronucleated PtK<sub>1</sub> cell. (E) Phase-contrast. (F) Superimposition of immunofluorescence (one confocal optical section) and phase-contrast images. The labelling is strongest over the dots and weaker in the nucleolar region (arrows).  $\times 2100$ .

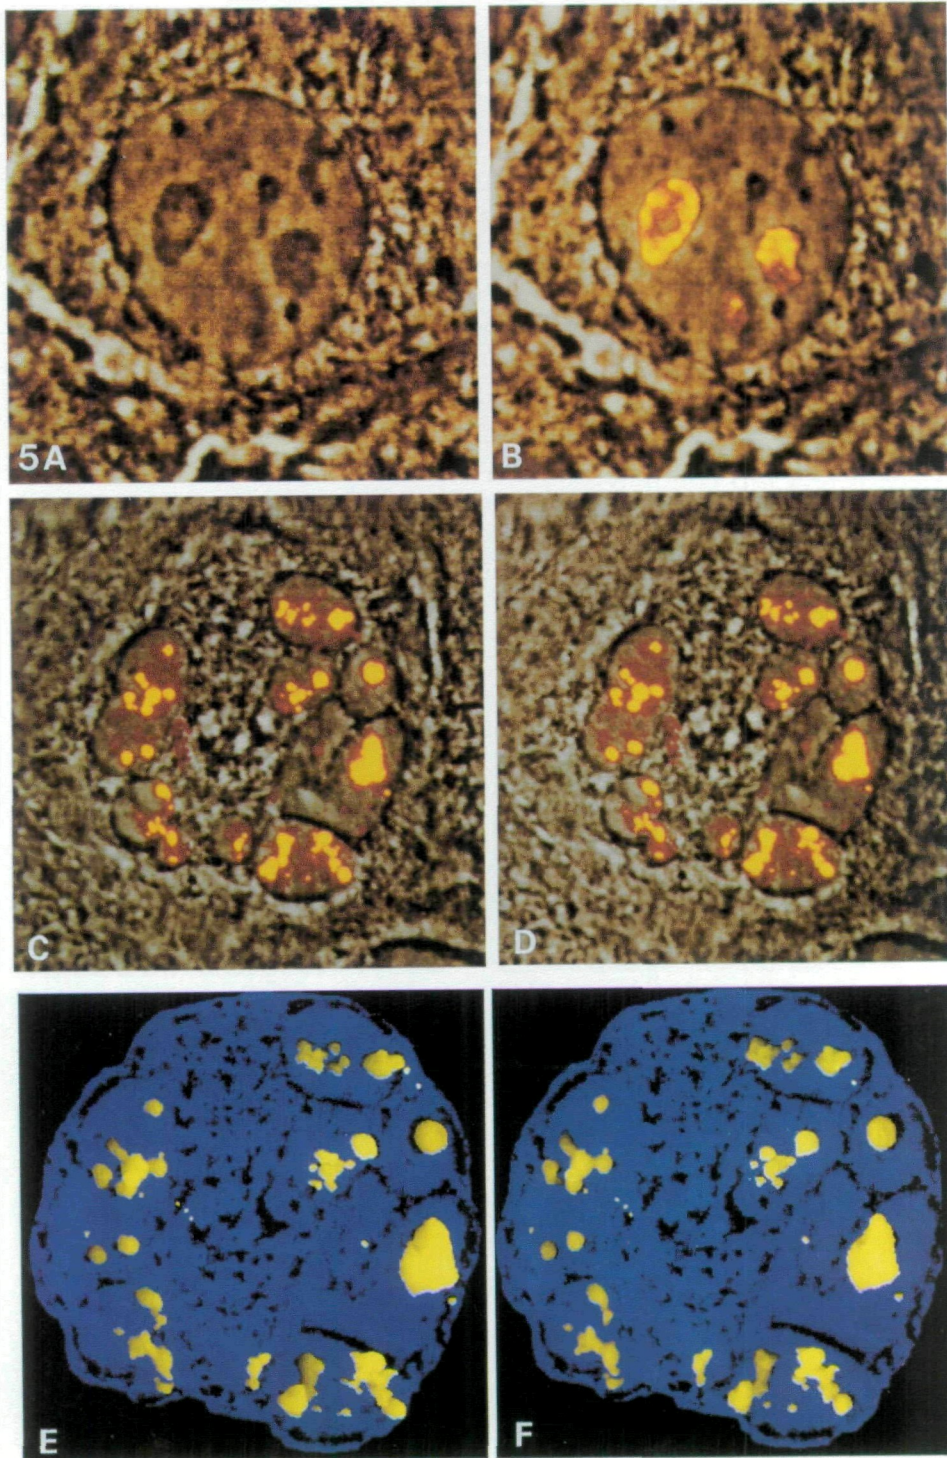

**Fig. 5.** CLSM localization of the GC-specific marker. (A–B) Interphase PtK<sub>1</sub> cell. (A) Phase-contrast. (B) Superimposition of immunofluorescence (one confocal optical section) and phase-contrast images. Strong labelling of the external regions of the nucleoli is evident.  $\times 2300$ . (C–D) Micronucleated PtK<sub>1</sub> cell. Stereoscopic reconstruction from 10 optical sections  $0.8 \mu\text{m}$  apart. Labelling is strong over both the nucleoli and dots. A weak nucleoplasmic labelling is seen mainly in micronuclei containing dots.  $\times 1700$ . (E–F) Computer-assisted 3–D reconstruction from a series of 10 confocal immunofluorescence images showing the distribution of the labelling in the micronucleus.  $\times 2200$ .

NOR per nucleolus, thus precluding the formation of complex structures, which could result from the association of several NORs in a nucleolus; (2) they are easily micronucleated to generate micronuclei with and without ribosomal genes. The PtK<sub>1</sub> nucleoli in cycling cells showed a typical reticulated structure, i.e. the fibrillar components formed a network (Fig. 2A). The GC is organized as aggregates located at the periphery of this network. In micronucleated cells, as already described (Hernandez-Verdun *et al.* 1979), some micronuclei possess a complete nucleolar structure, whereas others contain only fibrillar structures called dots, whose size varies between 0.1 and 0.6  $\mu\text{m}$  (Fig. 2B). We have shown earlier that in each micronucleated cell only those micronuclei with a nucleolus are actively engaged in rDNA transcription (Labidi *et al.* 1990).

#### *CLSM localization*

A precise localization of the antigens was obtained by superimposition of the phase-contrast and fluorescence images acquired using the same laser line. Furthermore, three-dimensional reconstructions were generated from serial optical sections by using different procedures (see Materials and methods).

#### *FC-specific marker*

The staining pattern obtained with the FC-specific marker (V11) exhibited three to five fluorescent spots per nucleolus in interphase cells (Fig. 3A–B). During mitosis, the labelling was found to be associated with two chromosomes. At telophase the newly formed nucleoli also displayed a distribution of these antigens in three to five sites per nucleolus, which could be seen on three consecutive optical planes 0.5  $\mu\text{m}$  apart (Fig. 3C–D).

In micronucleated cells the FC marker exhibited a complex distribution. In each cell examined, the nucleoli were strongly labelled and the nucleoplasm was negative. Three types of dot-containing micronuclei were found: those with only positive dots, those with only negative dots and those containing both positive and negative dots. The latter case was the most frequent (Fig. 3E–F).

#### *DFC-specific marker*

With the DFC-specific marker (A10), the staining was confined to from one to ten discrete sites located in the dense structures of the nucleoli as observed by phase-contrast (Fig. 4A–B,C–D). The spatial arrangement of these fluorescent spots differed from one nucleolus to another. In cells where the nucleolonema was clearly visible by phase-contrast, it could be seen generally to form circular or semi-circular figures (Fig. 4A–B,C–D). In such cases, we could observe on three-dimensional reconstruction that the fluorescent spots were distributed along a spiral (Fig. 4C–D). The number of spots per nucleolus and the distance between them did show some variation; on the other hand, the size of the spots remained quite constant from one nucleolus to another. At prophase, the number of labelled sites decreased and they were more closely packed than in the interphase nucleoli.

In micronucleated cells, we found spot labelling in the nucleoli with the A10 serum but, surprisingly, a stronger labelling in all the dots. In some micronuclei the nucleoplasm contained dispersed antigens (Fig. 4E–F). Observations of spontaneously formed micronuclei showed that the increased antigen concentration was not the result of colchicine treatment, but rather the consequence of micronucleation.

#### *GC-specific marker*

The GC-specific marker (G04) gave an intense fluorescent signal with wide distribution in the nucleoli of interphase cells. At high magnification the labelling appeared mostly at the periphery of the nucleolus (Fig. 5A–B). In micronucleated cells, the GC marker was found to be distributed in dots and nucleoli (Fig. 5C–D). The nucleoli were strongly labelled and no antigen could be detected in the nucleoplasm (Fig. 5C–D,E–F). In the other micronuclei, the intense dot signal appeared superimposed on some nucleoplasmic labelling. Three-dimensional reconstructions of micronuclei containing dots showed an intense positive signal in all dots and a weakly stained network between them, indicating that the nucleoplasm labelling may reflect the presence of specific structures linking the dots. The antigens appeared in the entire volume of the micronuclei, in some regions in the vicinity of the nuclear envelope.

## Discussion

The nucleolus is a very complex structure with multiple components; it is known to be the organelle of ribosome biogenesis (Nigg, 1988). However, despite the fact that the morphology of the nucleolus has been extensively studied, we are still lacking precise answers to such fundamental questions as the process of nucleolus formation and the role played by ribosomal genes in the assembly of the nucleolus (Karpen *et al.* 1988). In the present study, we have been interested in determining if the behaviour of non-ribosomal nucleolar proteins depends upon the presence and state of activity of the ribosomal genes. One hypothesis is that the presence of ribosomal sequences is required for assembly of nucleolar constituents; alternatively, the proteins may have intrinsic self-assembly properties allowing formation of prepackaged 'modules', which would later accumulate at the site of rRNA synthesis. In addition, signal sequences could mediate the targeting of the protein to the nucleoli as was recently shown for viral proteins (Nosaka *et al.* 1989; Kubota *et al.* 1989). We took advantage of the possibility of inducing the formation of micronuclei that do or do not contain ribosomal genes and of using specific markers for antigens associated with different subnucleolar compartments for investigating these questions.

#### *Nuclei with active ribosomal genes*

In cycling PtK<sub>1</sub> cells, the two NORs are active and two reticulated nucleoli are formed. By laser scanning microscopy, we mapped the three-dimensional distribution of the proteins in the nucleolar volume. The GC marker was found to be confined to the nucleolar periphery, whereas the FC and DFC markers are centrally located in discrete sites. The finding that the structures labelled by the latter two markers appear to be intermingled has interesting bearing on the internal architecture of the nucleolus in these cells. In PtK<sub>1</sub> cells, there is only one NOR per nucleolus, but the FC marker was distributed in several discrete sites (generally 3–5). It has been shown in the phytohaemagglutinin (PHA)-stimulated human lymphocytes that the number of FCs is also higher than the number of NORs and can approach the number of ribosomal genes after 48 h in culture (Hozak *et al.* 1989; Ochs and Smetana, 1989). We propose that during interphase FCs alternate with substructures of another component in one functional NOR. It is tempting to



consider that this pattern reflects the alternation of transcribed and non-transcribed rDNA. It has already been shown by EM that DFC regions are intercalated between the FCs (Hozak *et al.* 1986; Thiry and Goessens, 1986; Ploton *et al.* 1987a). This hypothesis is well corroborated by the three-dimensional localization we observed for the antigens confined in the DFC and by the finding that the number of signals with the DFC marker is generally higher than for the FC marker. These results are in agreement with data from three-dimensional reconstruction of EM serial sections of pancreatic rat nucleoli (Géraud *et al.* 1990). Another interesting finding is the distribution of the DFC marker in sites arranged in spiral order.

#### *Nuclei without ribosomal genes*

In the micronucleated PtK<sub>1</sub> cells, it has been demonstrated that some micronuclei contain an active nucleolus whereas others only possess several fibrillar dots (Phillips and Phillips, 1979; Géraud *et al.* 1989). These dots react with anti-nucleolar antibodies and are stained by NOR-silver staining (Hernandez-Verdun *et al.* 1979; Benavente *et al.* 1988b); therefore, they correspond to nucleolar constituents in nuclei lacking ribosomal genes (Labidi *et al.* 1990). In the present study, we obtained three new findings on the composition of these nucleolar dots.

First, we found that each nucleolar antigen tested can be present in the dots. These results are in contrast to those of a previous study in which only antibodies directed against the DFC were found to accumulate in the dots (Benavente *et al.* 1988a). This could be due to the fact that different antibodies were used and/or that confocal laser scanning microscopy allows better visualization of such small structures.

Second, there was a great variability in the amount of these nucleolar antigens in the dots. The FC antigen was found to be present in a smaller amount in dots than in the nucleoli, the GC-specific antigens were equally concentrated in both, and the DFC antigen was present at a higher concentration in dots. The distribution of the DFC antigens appears to be inconsistent with the type of activity that takes place in this nucleolar compartment. However, it is not the only example of accumulation of DFC proteins in non-transcribing structures, since Ag-NOR proteins have also been found in the dots (Hernandez-Verdun *et al.* 1979). These observations indicate that the material accumulated in dots does not only represent nucleolar proteins coating the chromosomes during mitosis and trapped in micronuclei at the time of nuclear envelope formation. The presence of these nucleolar proteins, including those specific for the FC, in all the micronuclei indicates that they were addressed to nuclei independently of the presence of ribosomal genes.

Third, the dots, while containing antigens specific for all three nucleolar components, have ultrastructural features similar to those of the DFC. Therefore, they could be considered as subnucleolar modules in which the proteins are not assembled in the same way as in a functional nucleolus. Prepackaged nucleolar modules with similar structures are known to occur during the first step of nucleogenesis at the end of mitosis. These so-called prenucleolar bodies (PNBs), contain nucleolin (C23), the B23 proteins and Ag-NOR proteins (Ochs *et al.* 1985; Ploton *et al.* 1987b). Except for the finding that both dots and these PNBs contain Ag-NOR proteins, it is not known to what extent the compositions of these structures are identical. In any case, both structures seemed to behave

similarly in the presence of active NORs. They are targeted to these latter sites and reorganize themselves to form functional nucleoli. Furthermore, the mere presence of NORs is not sufficient for this targeting to occur: active ribosomal RNA synthesis is required (Benavente *et al.* 1987; Karpen *et al.* 1988).

In conclusion, the present data indicate that the nucleolar proteins, in the presence of specific genes, are distributed in accordance with their role in ribosome biogenesis in functional nucleolar structures; alternatively, in the absence of ribosomal genes and rRNA they can aggregate in prepackaged independent modules. As a consequence of the aggregation, a single signal sequence in only one of the proteins would be sufficient to mediate the targeting of these preformed modules to their final position.

We thank Miss Eleonor Mann for help in correcting and typing the manuscript, and Miss Francine Devienne for photographic work. This work was supported in part by grants from the Centre National de la Recherche Scientifique, l'Association pour la Recherche sur le Cancer (Contract 6703) and from the Deutsche Forschungsgemeinschaft.

#### References

- AKEY, C. W. AND GOLDFARB, D. S. (1989). Protein import through the nuclear pore complex is a multistep process. *J. Cell Biol.* **109**, 971-982.
- BENAVENTE, R., REIMER, G., ROSE, K. M., HÜGLE-DÖRR, B. AND SCHEER, U. (1988a). Nucleolar changes after microinjection of antibodies to RNA polymerase 1 into the nucleus of mammalian cells. *Chromosoma* **97**, 115-123.
- BENAVENTE, R., ROSE, K. M., REIMER, G., HÜGLE-DÖRR, B. AND SCHEER, U. (1987). Inhibition of nucleolar reformation after microinjection of antibodies to RNA polymerase 1 into mitotic cells. *J. Cell Biol.* **105**, 1483-1491.
- BENAVENTE, R., SCHMIDT-ZACHMANN, M. S., HÜGLE-DÖRR, B., REIMER, G., ROSE, K. M. AND SCHEER, U. (1988b). Identification and definition of nucleolus-related fibrillar bodies in micronucleated cells. *Expl Cell Res.* **178**, 518-523.
- BENDAYAN, M. AND ZOLLINGER, M. (1983). Ultrastructural localization of antigenic sites on osmium-fixed tissues applying the protein A-gold technique. *J. Histochem. Cytochem.* **31**, 101-109.
- BRACKENHOFF, G. J., VAN DER VOORT, H. T. M., VAN SPRONSEN, E. A. AND NANNINGA, N. (1986). Three-dimensional imaging by confocal scanning fluorescence microscopy. *Ann. N.Y. Acad. Sci.* **483**, 405-415.
- DINGWALL, C., ROBBINS, J., DILWORTH, S. M., ROBERTS, B. AND RICHARDSON, W. D. (1988). The nucleoplasmic nuclear location sequence is larger and more complex than that of SV-40 large T antigen. *J. Cell Biol.* **107**, 841-849.
- ESCAIG, J. (1982). New instruments which facilitate rapid freezing at 83K and 6K. *J. Microsc.* **126**, 221-229.
- FRACKOWIAK, S., LABIDI, B., HERNANDEZ-VERDUN, D. AND BOUTELLE, M. (1986). Preservation of chromosome integrity during micronucleation induced by colchicine in PtK<sub>1</sub> cells. *Chromosoma* **94**, 468-474.
- GÉRAUD, G., LAQUERRIÈRE, F., MASSON, C., ARNOULT, J., LABIDI, B. AND HERNANDEZ-VERDUN, D. (1989). Three-dimensional organization of micronuclei induced by colchicine in PtK<sub>1</sub> cells. *Expl Cell Res.* **181**, 27-39.
- GÉRAUD, G., SOYER, A. AND EPELBOIN, Y. (1988). Three-dimensional computer reconstructions from serial sections of cell nuclei. *Biol. Cell.* **62**, 11-117.
- GÉRAUD, G., SOYER, A. AND HERNANDEZ-VERDUN, D. (1990). Computer reconstruction of nucleolar architecture by interactive three-dimensional color display. *J. Electron Microsc. Technique* (in press).
- GOESSENS, G. (1984). Nucleolar structure. *Int. Rev. Cytol.* **87**, 107-168.
- HADJIOLOV, A. A. (1985). *The Nucleolus and Ribosome Biogenesis*, pp. 1-268. Wien, New York: Springer-Verlag.
- HERNANDEZ-VERDUN, D. (1986). Structural organization of the nucleolus in mammalian cells. *Meth. Achiev. exp. Path.* **12**, 26-62.
- HERNANDEZ-VERDUN, D., BOUTELLE, M., EGE, T. AND RINGERTZ, N. R. (1979). Fine structure of nucleoli in micronucleated cells. *Expl Cell Res.* **124**, 223-235.
- HERNANDEZ-VERDUN, D., PRÉVOT, S., ANDRÉ, C., GUILLY, M. N., MASSON, C. AND WOLFE, J. (1988). Autoimmune serum containing an antibody against a 94 kDa nucleolar protein. *Biol. Cell* **64**, 331-341.

- HOZAK, P., NOVAK, J. T. AND SMETANA, K. (1989). Three-dimensional reconstructions of nucleolus-organizing regions in PHA-stimulated human lymphocytes. *Biol. Cell* **66**, 225–233.
- HOZAK, P., ZATSEPINA, O., VASILYEVA, I. AND CHENTSON, Y. (1986). An electron microscopic study of nucleolus-organizing regions at some stages of the cell cycle (G0 period, G2 period, mitosis) *Biol. Cell* **57**, 197–206.
- HUNT, T. (1989). Cytoplasmic anchoring proteins and the control of nuclear localization. *Cell* **59**, 949–951.
- INOUE, S. AND INOUE, T. D. (1986). Computer-aided stereoscopic video reconstruction and serial display from high-resolution light microscope optical sections. *Ann. N. Y. Acad. Sci. U.S.A.* **483**, 392–404.
- KARPEN, G. H., SCHAEFER, J. E. AND LAIRD, C. D. (1988). A *Drosophila* rRNA gene located in euchromatin is active in transcription and nucleolus formation. *Genes Dev.* **2**, 1745–1763.
- KUBOTA, S., SIOMI, H., SATOH, T., ENDO, S., MAKI, M. AND HATANAKA, M. (1989). Functional similarity of HIV-1 rev and HTLV-1 rex proteins: identification of a new nucleolar-targeting signal in rev protein. *Biochem. biophys. Res. Commun.* **162**, 963–970.
- LABIDI, B., BRODERS, F., MEYER, J. L. AND HERNANDEZ-VERDUN, D. (1990). Distribution of rDNA and 28S, 18S and 5S rRNA in micronuclei containing a single chromosome. *Biochem. Cell Biol.* **68**, 957–964.
- LABIDI, B., FRACKOWIAK, S. AND HERNANDEZ-VERDUN, D. (1987a). Identification and sorting of micronuclei containing individual chromosomes. *Expl. Cell Res.* **173**, 617–627.
- LABIDI, B., GRÉGOIRE, M., FRACKOWIAK, S., HERNANDEZ-VERDUN, D. AND BOUTEILLE, M. (1987b). RNA polymerase activity in PtK<sub>1</sub> micronuclei containing individual chromosomes. An *in vitro* and *in situ* study. *Expl. Cell Res.* **169**, 233–244.
- MASSON, C., ANDRÉ, C., ARNOULT, J., GÉRAUD, G. AND HERNANDEZ-VERDUN, D. (1990). A 116 000 M<sub>r</sub> nucleolar antigen specific for the dense fibrillar component of the nucleoli. *J. Cell Sci.* **95**, 371–381.
- NEWMAYER, D. D. AND FORBES, D. J. (1988). Nuclear import can be separated into distinct steps *in vitro*: nuclear pore binding and translocation. *Cell* **52**, 641–653.
- NIGG, E. A. (1988). Nuclear function and organization: the potential of immunochemical approaches. *Int. Rev. Cytol.* **110**, 27–92.
- NOSAKA, T., SIOMI, H., ADACHI, Y., ISHIBASHI, M., KUBOTA, S., MAKI, M. AND HATANAKA, M. (1989). Nucleolar targeting signal of human T-cell leukemia virus type 1 rex-encoded protein is essential for cytoplasmic accumulation of unspliced viral mRNA. *Proc. natn. Acad. Sci. U.S.A.* **86**, 9798–9802.
- OCHS, R. L., LISCHWE, M. A., SHEN, E., CARROLL, R. E. AND BUSCH, H. (1985). Nucleologenesis: composition and fate of prenucleolar bodies. *Chromosoma* **92**, 330–336.
- OCHS, R. L. AND SMETANA, K. (1989). Fibrillar center distribution in nucleoli of PHA-stimulated human lymphocytes. *Expl. Cell Res.* **184**, 552–557.
- PHILLIPS, S. G. AND PHILLIPS, D. M. (1979). Nucleolus-like bodies in micronuclei of cultured *Xenopus* cells. *Expl. Cell Res.* **120**, 295–306.
- PLOTON, D., BEORCHIA, A., MENAGER, M., JEANNESSON, P. AND ADNET, J.-J. (1987a). The three-dimensional ultrastructure of interphasic and metaphasic nucleolar argyrophilic components studied with high-voltage electron microscopy in thick sections. *Biol. Cell* **59**, 113–120.
- PLOTON, D., THIRY, M., MENAGER, M., LEPOINT, A., ADNET, J.-J. AND GOESSENS, G. (1987b). Behaviour of nucleolus during mitosis. A comparative ultrastructural study of various cancerous cell lines using the Ag-NOR staining procedure. *Chromosoma* **95**, 95–107.
- RINGERTZ, N. R. AND SAVAGE, R. E. (1976). *Cell Hybrids*, pp. 1–366. Academic Press, New York.
- ROBERT-NICOUD, M., ARNDT-JOVIN, D. J., SCHORMANN, T. AND JOVIN, T. M. (1989). 3-D imaging of cells and tissues using confocal laser scanning microscopy and digital processing. *Eur. J. Cell Biol.* **48** (Suppl. 25), 49–52.
- ROTH, M. B. AND GALL, J. G. (1989). Targeting of a chromosomal protein to the nucleus and to lampbrush chromosome loops. *Proc. natn. Acad. Sci. U.S.A.* **86**, 1269–1272.
- SCHREER, U. AND BENAVENTE, R. (1990). Functional and dynamic aspect of the mammalian nucleolus. *BioEssays* **12**, 14–21.
- THIRY, M. AND GOESSENS, G. (1986). Ultrastructural study of the relationship between the various nucleolar components in Ehrlich tumour and HEP-2 cell nucleoli after acetylation. *Expl. Cell Res.* **164**, 232–242.
- TOKUYASU, K. T. (1973). A technique for ultracytometry of cell suspensions and tissues. *J. Cell Biol.* **57**, 551–565.
- YAMASAKI, L., KANDA, P. AND LANFORD, R. E. (1989). Identification of four nuclear transport signal-binding proteins that interact with diverse transport signals. *Molec. cell. Biol.* **9**, 3028–3036.

(Received 10 July 1990 – Accepted, in revised form, 15 October 1990)
